# Supplementary material for: Sex-dependent colonic microbiota modulation by hazelnut (Corylus avellana L.) dietary fiber
Source: Royal Society of Chemistry journal article supplement (doi:10.1039/d3fo00570d), 2023-01-01
Supplement: d3fo00570d1.pdf [file d3fo00570d1.pdf]

# 1 Sex-Dependent Colonic Microbiota Modulation by Hazelnut (*Corylus avellana* 2 L.) Dietary Fibers

3 Elanur Daştan<sup>a,+</sup>, Ömer F. Çelik<sup>a,+</sup>, Orhan Baş<sup>b,++</sup>, Zafer Bulut<sup>c,d</sup>, Stephen R. Lindemann<sup>e,f,g</sup>, Mehmet İ. Tugay<sup>a</sup>,  
4 Muhammet Değermenci<sup>b</sup>, Beyza Suvarıklı-Alan<sup>c</sup>, Mehmet Nizamlioğlu<sup>c</sup>, Yunus E. Tunçil<sup>a,^,\*</sup>

5 <sup>a</sup> Food Engineering Department, Agricultural Faculty, Ordu University, Ordu, 52200, TÜRKİYE.

6 <sup>b</sup> Department of Anatomy, Faculty of Medicine, Ordu University, Ordu, 52200, TÜRKİYE.

7 <sup>c</sup> Department of Biochemistry, Faculty of Veterinary Medicine, Selçuk University, Konya, TÜRKİYE.

8 <sup>d</sup> Faculty of Veterinary Medicine, Dokuz Eylül University, İzmir, TÜRKİYE.

9 <sup>e</sup> Whistler Center for Carbohydrate Research, Department of Food Science, Purdue University, West Lafayette, 47907, IN, USA.

10 <sup>f</sup> Department of Nutrition, Purdue University, West Lafayette, 47907, IN, USA.

11 <sup>g</sup> Department of Biological Science, Purdue University, West Lafayette, 47907, IN, USA.

12 <sup>+</sup> These authors contributed equally.

13 <sup>++</sup> Current address: Department of Anatomy, Faculty of Medicine, Samsun University, Samsun, TÜRKİYE.

14 <sup>^</sup> Current address: Food Engineering Department, Engineering Faculty, Necmettin Erbakan University, Konya, 42090, TÜRKİYE.

15 <sup>\*</sup> Author for correspondence: ytuncil@erbakan.edu.tr

## 18 SUPPLEMENTARY TEXT

### 20 Materials & methods

#### 21 Determining the monosaccharide compositions and linkage profiles of the extracted IDFs and SDFs

22 Monosaccharide compositions and linkage characterizations of extracted IDFs and SDFs were analyzed using a gas  
23 chromatography coupled with mass spectrometry (GC/MS), as previously described by Pettolino *et al.*<sup>1</sup>. Briefly, samples were  
24 firstly subjected to carboxyl reduction. For monosaccharide composition, pre-reduced samples were exposed to alditol acetate  
25 derivatization protocol, where hydrolysis of SDFs and IDFs were achieved using trifluoroacetic acid (TFA) and sulfuric acid,  
26 respectively.<sup>1</sup> The monosaccharides were quantified as their alditol acetate derivatives on a capillary column (RTX-2330, Restek  
27 Corp., Bellefonte, PA, USA) by GC/MS (Shimadzu QP-2010 Ultra, Shimadzu Corp. Kyoto, Japan). For linkage characterizations, pre-  
28 reduced samples were subjected to a partial-methylation process, followed by exposure to alditol acetate derivatization  
29 protocol.<sup>1</sup> Partially methylated alditol acetates were run on GC/MS coupled with RTX-2330 column and quantified as previously  
30 specified.<sup>1</sup> The GC/MS setup conditions were as follows; injection temperature: 240 °C; injection volume 1 µL (split ratio: 1:15);  
31 helium was used as a carrier gas at 1.14 mL/min; oven temperature was set to 160 °C. This temperature was held for 7.15 min,  
32 then ramped at 4 °C/min to 220 °C, held for 4.10 min, and then ramped at 2.90 °C/min to 240 °C, held for 5.15 min and finally  
33 ramped at 10.8 °C/min to 260 °C, with a final hold of 5.10 min. The mass selective detector (MSD) transfer line was maintained  
34 at 260 °C.

35

### 36 Results and Discussion

#### 37 Monosaccharide and glycosidic linkage compositions of DFs extracted from natural hazelnut, roasted hazelnut, and hazelnut

38 skin

### 39 **Natural hazelnut, roasted hazelnut, and hazelnut skin possess structurally different IDFs**

40 IDFs were composed mainly of glucose, xylose, arabinose, galacturonic acid, and mannose (**Table S1**), indicating that  
41 hazelnut DFs are mainly composed of cellulose, pectic polysaccharides, and xyloglucans. Glycosidic linkage analyses also  
42 confirmed these predictions (**Table S1**). This is in an agreement with our previous research<sup>2</sup> and others who worked on the DFs  
43 of dicotyledonous plants (to which hazelnut belongs), which are composed mainly of cellulose, pectic polysaccharides, and  
44 xyloglucans.<sup>3-5</sup> However, monosaccharide compositions of extracted DFs differed among groups, suggesting that their structural  
45 features vary. For example, IDFs of hazelnut skin had a significantly ( $p < 0.05$ ) higher amount of galacturonic acid (11.24%),  
46 compared to those from roasted (4.41%) and natural (6.61%) hazelnuts. To quantify and provide detailed insights into the  
47 structural features of IDFs, we examined their glycosidic linkage profiles in detail.

48 **Hemicelluloses:** The main hemicelluloses found in dicotyledonous plants are heteromannans and xyloglucans.<sup>5</sup> 4-Man  
49 and 4,6-Man linkages are components of the heteromannan chain.<sup>1,6</sup> In addition to possessing t-Gal units (indicative of the  
50 number of branches), heteromannans could also contain 4-Glc equivalent to 4-Man; and 4,6-Glc equivalent to 4,6-Man linkages  
51 (Pettolino et al., 2012). Thus, by summing up the 4-Man, 4-Glc (equivalent to 4-Man), 4,6-Man, 4,6-Glc (equivalent to 4,6-Man)  
52 and t-Gal (equivalent to branches), heteromannans present in the insoluble fractions of natural hazelnut, roasted hazelnut, and  
53 hazelnut skin were calculated to be 8.07%, 8.59%, and 2.84%, respectively. The remaining 4,6-Glc was assumed to be part of  
54 xyloglucan. Moreover, xyloglucans also contain the 4-Glc linkage (equivalent to 4,6-Glc) and 2-Xyl (equivalent to or less than  
55 branching points), in addition to having t-Fuc and t-Xyl in their branching points.<sup>1,6</sup> By summing up the 4,6-Glc, 4-Glc, 2-Xyl, t-Fuc,  
56 and t-Xyl, xyloglucans were found to contain 19.22%, 22.98%, and 17.20% of the insoluble fractions of natural hazelnut, roasted  
57 hazelnut, and hazelnut skin, respectively. The presence of 2-Xyl, t-Fuc, and t-Xyl glycosidic linkages suggest that xyloglucans found  
58 in the insoluble fractions of natural hazelnut, roasted hazelnut, and hazelnut skin possess X and F side chains as branching units.  
59 In addition, by calculating the ratio of xylose-related linkages to glucose-related linkages, branching densities of these xyloglucans  
60 were estimated to be 0.61, 0.53, and 0.70 for the xyloglucans of natural hazelnut, roasted hazelnut, and hazelnut skin,  
61 respectively. These suggest that xyloglucans in the insoluble fraction of hazelnut skin were more densely branched, compared to  
62 that of natural hazelnut, whereas that of roasted hazelnut was the least densely branched.

63 **Cellulose:** 4-Glc is a common glycosidic linkage present in starch, cellulose, and hemicelluloses of plants. Since hazelnut  
64 has been known to contain only limited amount of starch ( $< 2\%$ )<sup>7</sup> and samples used in this study were extensively treated with  
65 pancreatin (that contains amylases), all the detected 4-Glc linkages in these samples very likely belong to cellulose and  
66 hemicelluloses. By subtracting 4-Glc linkages assigned to hemicelluloses from total 4-Glc linkages, we estimated the cellulose  
67 contents in the insoluble fraction of the samples to be 39.95%, 46.56%, and 49.77% for natural hazelnut, roasted hazelnut, and  
68 hazelnut skin, respectively.

69 **Pectic polysaccharides:** The presences of high number of 1,4-GalA linkages (a typical bond found in the linear chain of pectic  
70 polysaccharides [homogalacturonan, HG]), and 2-Rha and 2,4-Rha linkages (typical linkages found in the hairy region of pectic  
71 polysaccharides [rhamnogalacturonan I, RGI]) indicate that the insoluble fractions of the extracted DFs contain a significant  
72 amount of pectic polysaccharides. RGI/HG ratios of the pectic polysaccharides were estimated by calculating the rhamnose to  
73 galacturonic acid residues ratio, which were found to be 0.59, 0.37, and 0.25 for natural hazelnut, roasted hazelnut, and hazelnut  
74 skin, respectively. These data suggest that pectic polysaccharides in the insoluble fractions of natural hazelnut possess more hairy  
75 regions than that of roasted hazelnut, and pectic polysaccharides of hazelnut skin are the least branched. The  
76 rhamnose/galacturonic acid ratio obtained in this study is lower than the ones obtained in our previous study<sup>2</sup> in which the  
77 rhamnose/galacturonic acid ratio for IDFs of natural hazelnut, roasted hazelnut, and hazelnut skin were calculated to be 0.49,  
78 0.64, and 0.49, respectively. These differences between studies could be attributed to the different harvesting years because  
79 harvesting time has been known to impact the structural features of structural polysaccharides of plants.<sup>8</sup>

80 Branching densities of the RGI regions of hazelnut pectic polysaccharides were also estimated by calculating the ratio of  
81 2,4-Rha linkage (branching units) to total rhamnose-related linkages, which were found to be 0.47, 0.49, and 0.55 for natural  
82 hazelnut, roasted hazelnut, and hazelnut skin, respectively, suggesting that RGI region of hazelnut pectic polysaccharides are  
83 heavily branched. The presence of arabinose linkages [5-Ara(f), 3,5-Ara(f), 2,3,5-Ara(f) and t-Ara(f)] as well as galactose related  
84 linkages [t-Gal and 4-Gal] indicate that the branching points of RGI regions are made mainly of arabinan and galactan molecules.

85 The total pectic polysaccharide amount present in the insoluble fractions of samples were estimated by summing up  
86 the 2-Rha, 2,4-Rha, t-Ara(f), 5-Ara(f), 3,5-Ara(f), 2,3,5-Ara(f), t-Gal, 4-Gal, t-GalA, and 4-GalA. These values were found to be  
87 25.46%, 16.76%, and 22.71% for natural hazelnut, roasted hazelnut, and hazelnut skin, respectively.

### 89 **Natural hazelnut, roasted hazelnut, and hazelnut skin possess structurally different SDFs**

90 Arabinose, galacturonic acid, galactose, xylose, glucose, rhamnose, and mannose were mainly detected in SDFs of the  
91 samples (**Table S2**), indicating that the SDFs of hazelnut samples are mainly composed of pectic polysaccharides and  
92 hemicelluloses (mainly xyloglucans and [hetero]mannans). Glycosidic linkage analyses also confirmed the presence of such  
93 polysaccharide molecules (**Table S2**), which is in an agreement with our previous research.<sup>2</sup> Like the IDFs, monosaccharide  
94 compositions of SDFs differ among groups, suggesting that their structural features vary.

95 **Pectic polysaccharides:** Total pectic polysaccharide contents of hazelnut DFs were estimated by summing up the pectic  
96 polysaccharide related linkages [2-Rha, 2,4-Rha, t-Ara(*f*), 5-Ara(*f*), 3,5-Ara(*f*), 2,3,5-Ara(*f*), t-Gal, 4-Gal, t-GalA, and 4-GalA]. These  
97 values were calculated to be 67.8%, 63.9%, and 57.7% for natural hazelnut, roasted hazelnut, and hazelnut skin samples,  
98 respectively. In addition, rhamnose/galacturonic acid ratios for natural hazelnut, roasted hazelnut, and hazelnut skin samples  
99 were calculated to be 0.65, 0.35, and 0.18, respectively, suggesting that pectic polysaccharides in the soluble fractions of hazelnut  
100 skin possess longer linear (smooth) regions and less branched (hairy) regions, compared to those from natural and roasted  
101 hazelnuts. Moreover, like the ones in insoluble fractions of the samples, the ratio of the 2,4-Rha linkage to total rhamnose-related  
102 linkages (calculated to be 48%, 63% and 51% for natural hazelnut, roasted hazelnut, and hazelnut skin samples, respectively)  
103 suggests that RGI of the pectic polysaccharides in soluble fractions of the samples are densely branched. Arabinose/galactose  
104 ratio of the samples (1.64, 1.84, and 1.78 for natural hazelnut, roasted hazelnut, and hazelnut skin samples, respectively) suggests  
105 that the RGI of the pectic polysaccharides in the soluble fractions of the samples contains more arabinan as a branching point  
106 than galactan molecules.

107 **Hemicelluloses:** The presences of significant amounts of mannoses, glucose and xylose suggest that soluble fractions of  
108 the samples are composed mainly of mannan and xyloglucan. Detection of significant amounts of 4-Man, 4-Glc, and 4,6-Glc also  
109 confirms this, as they are the typical linkages of mannan and xyloglucans. Mannan polymers could possess branching points at  
110 the O-6 positions of mannose residues; however, no 4,6-Man linkages were detected, suggesting that mannans detected in the  
111 soluble fractions have a linear structure. Such linear mannans are also detected in many other plants.<sup>9,10</sup> Therefore, the relative  
112 abundances of mannan polymers in the samples were assumed to be equal to the that of mannose units, which are 4.1%, 7.7%,  
113 and 8.2% for natural hazelnut, roasted hazelnut, and hazelnut skin samples, respectively.

114 Xyloglucan contents of the samples were estimated to be 13.4% and 18.4% for natural and roasted hazelnut samples,  
115 respectively by summing up the 4,6-Glc, 4-Glc and t-Xyl (equal to the 4,6-Glc). Detection of only t-Xyl suggests that xyloglucans of  
116 soluble fractions of natural and roasted hazelnut samples have X-type side chains.<sup>5,11</sup> On the other hand, no evidence of the 4,6-  
117 Glc linkage was detected in the soluble fraction of the hazelnut skin sample, suggesting that, unlike natural and roasted hazelnut  
118 samples, xyloglucans found in the soluble fraction of hazelnut skin have a linear structure.

119

120

121

## SUPPLEMENTARY TABLES

122

123 **Table S1.** Monosaccharide and glycosidic linkage compositions of IDFs of roasted hazelnut, natural (raw) hazelnut, and hazelnut

| Monosaccharide /<br>Glycosidic linkage | Amount (% mole)           |                           |                           |
|----------------------------------------|---------------------------|---------------------------|---------------------------|
|                                        | Roasted hazelnut          | Natural hazelnut          | Hazelnut skin             |
| Rhamnose                               | 1.63 ± 0.41 <sup>B</sup>  | 3.89 ± 0.39 <sup>A</sup>  | 2.84 ± 0.78 <sup>AB</sup> |
| Fucose                                 | 1.43 ± 0.12               | 2.16 ± 1.38               | 1.05 ± 0.20               |
| Arabinose                              | 7.03 ± 0.49 <sup>B</sup>  | 11.66 ± 1.32 <sup>A</sup> | 4.93 ± 0.16 <sup>C</sup>  |
| Xylose                                 | 11.25 ± 0.27 <sup>B</sup> | 12.58 ± 0.61 <sup>A</sup> | 12.54 ± 0.52 <sup>A</sup> |
| Mannose                                | 3.92 ± 0.27 <sup>A</sup>  | 3.10 ± 0.64 <sup>AB</sup> | 2.30 ± 0.34 <sup>B</sup>  |
| Galactose                              | 5.36 ± 0.26 <sup>A</sup>  | 5.14 ± 0.39 <sup>A</sup>  | 3.70 ± 0.24 <sup>B</sup>  |
| Galacturonic acid                      | 4.41 ± 0.21 <sup>B</sup>  | 6.61 ± 0.50 <sup>B</sup>  | 11.24 ± 0.71 <sup>A</sup> |
| Glucose                                | 64.65 ± 1.18 <sup>A</sup> | 53.83 ± 1.86 <sup>B</sup> | 61.30 ± 1.20 <sup>A</sup> |
| Glucuronic acid                        | 0.32 ± 0.01 <sup>B</sup>  | 1.02 ± 0.04 <sup>A</sup>  | 0.09 ± 0.00 <sup>C</sup>  |

124 skin (mole basis, %)\*.

|                       |                           |                           |                           |
|-----------------------|---------------------------|---------------------------|---------------------------|
| t-Fuc( <i>p</i> )     | 1.43 ± 0.12               | 2.16 ± 1.38               | 1.05 ± 0.20               |
| t-Ara( <i>f</i> )     | 1.87 ± 0.13 <sup>B</sup>  | 2.67 ± 0.30 <sup>A</sup>  | 0.53 ± 0.02 <sup>C</sup>  |
| 5-Ara( <i>f</i> )     | 2.97 ± 0.21 <sup>B</sup>  | 4.38 ± 0.49 <sup>A</sup>  | 3.21 ± 0.10 <sup>B</sup>  |
| 3,5-Ara( <i>f</i> )   | 1.28 ± 0.09 <sup>B</sup>  | 2.52 ± 0.29 <sup>A</sup>  | 0.16 ± 0.01 <sup>C</sup>  |
| 2,3,5-Ara( <i>f</i> ) | 0.91 ± 0.06 <sup>B</sup>  | 2.09 ± 0.24 <sup>A</sup>  | 1.03 ± 0.03 <sup>B</sup>  |
| 2-Rha( <i>p</i> )     | 0.83 ± 0.21 <sup>B</sup>  | 2.08 ± 0.21 <sup>A</sup>  | 1.28 ± 0.35 <sup>B</sup>  |
| 2,4-Rha( <i>p</i> )   | 0.80 ± 0.20 <sup>B</sup>  | 1.82 ± 0.18 <sup>A</sup>  | 1.56 ± 0.43 <sup>A</sup>  |
| t-Xly( <i>p</i> )     | 6.02 ± 0.14 <sup>B</sup>  | 9.26 ± 0.45 <sup>A</sup>  | 2.81 ± 0.12 <sup>C</sup>  |
| 2-Xyl( <i>p</i> )     | 1.83 ± 0.04 <sup>C</sup>  | 3.32 ± 0.16 <sup>B</sup>  | 3.82 ± 0.16 <sup>A</sup>  |
| 2,4-Xyl( <i>p</i> )   | 1.63 ± 0.04 <sup>A</sup>  | –                         | 1.41 ± 0.06 <sup>B</sup>  |
| 2,3,4-Xyl( <i>p</i> ) | 1.77 ± 0.04 <sup>B</sup>  | –                         | 4.49 ± 0.19 <sup>A</sup>  |
| t-Man( <i>p</i> )     | 0.45 ± 0.03 <sup>B</sup>  | –                         | 0.88 ± 0.13 <sup>A</sup>  |
| 4-Man( <i>p</i> )     | 2.45 ± 0.17 <sup>A</sup>  | 2.42 ± 0.50 <sup>A</sup>  | 0.94 ± 0.14 <sup>B</sup>  |
| 4,6-Man( <i>p</i> )   | 1.02 ± 0.07 <sup>A</sup>  | 0.69 ± 0.14 <sup>B</sup>  | 0.48 ± 0.07 <sup>B</sup>  |
| t-Gal( <i>p</i> )     | 1.67 ± 0.08               | 1.85 ± 0.14               | –                         |
| 4-Gal( <i>p</i> )     | 3.69 ± 0.18               | 3.29 ± 0.25               | 3.69 ± 0.23               |
| t-GalA( <i>p</i> )    | 1.30 ± 0.06 <sup>C</sup>  | 1.90 ± 0.14 <sup>B</sup>  | 3.30 ± 0.21 <sup>A</sup>  |
| 4-GalA( <i>p</i> )    | 3.11 ± 0.15 <sup>C</sup>  | 4.71 ± 0.35 <sup>B</sup>  | 7.95 ± 0.50 <sup>A</sup>  |
| t-Glc( <i>p</i> )     | 0.52 ± 0.01 <sup>B</sup>  | 0.17 ± 0.01 <sup>C</sup>  | 0.59 ± 0.01 <sup>A</sup>  |
| 4-Glc( <i>p</i> )     | 56.06 ± 1.02 <sup>A</sup> | 47.67 ± 1.64 <sup>B</sup> | 55.47 ± 1.08 <sup>A</sup> |
| 4,6-Glc( <i>p</i> )   | 8.07 ± 0.15 <sup>A</sup>  | 5.99 ± 0.21 <sup>B</sup>  | 5.24 ± 0.10 <sup>C</sup>  |
| t-GlcA( <i>p</i> )    | 0.32 ± 0.01 <sup>B</sup>  | 1.02 ± 0.04 <sup>A</sup>  | 0.10 ± 0.00 <sup>C</sup>  |

125

126

127

\* Values are represented as mean ± standard error. Statistical analyses were done between fiber groups for each constituent, and values possessing different capital letters are statistically different (Tukey's test,  $p < 0.05$ ).

128

129

130 **Table S2.** Monosaccharide and glycosidic linkage compositions of soluble DFs of roasted hazelnut, natural (raw) hazelnut, and

131 hazelnut skin (mole basis, %)\*.

| Monosaccharide    | Amount (% mole)            |                           |                           |
|-------------------|----------------------------|---------------------------|---------------------------|
|                   | Roasted hazelnut           | Natural hazelnut          | Hazelnut skin             |
| Rhamnose          | 6.53 ± 0.48 <sup>B</sup>   | 8.23 ± 0.00 <sup>A</sup>  | 6.56 ± 0.55 <sup>B</sup>  |
| Fucose            | 1.35 ± 0.12                | 1.93 ± 0.36               | 1.10 ± 0.68               |
| Arabinose         | 24.98 ± 1.85 <sup>A</sup>  | 24.83 ± 1.13 <sup>A</sup> | 9.72 ± 0.96 <sup>B</sup>  |
| Xylose            | 8.86 ± 0.96 <sup>B</sup>   | 13.20 ± 0.64 <sup>A</sup> | 8.81 ± 1.93 <sup>B</sup>  |
| Mannose           | 7.73 ± 1.38 <sup>A</sup>   | 4.05 ± 1.04 <sup>B</sup>  | 8.19 ± 0.51 <sup>A</sup>  |
| Galactose         | 13.57 ± 2.20 <sup>A</sup>  | 15.18 ± 0.41 <sup>A</sup> | 5.46 ± 0.04 <sup>B</sup>  |
| Galacturonic acid | 18.84 ± 3.05 <sup>B</sup>  | 19.53 ± 0.53 <sup>B</sup> | 35.97 ± 0.23 <sup>A</sup> |
| Glucose           | 14.97 ± 5.14 <sup>AB</sup> | 12.74 ± 0.16 <sup>B</sup> | 23.50 ± 0.81 <sup>A</sup> |
| Glucuronic acid   | 0.71 ± 0.24                | 0.31 ± 0.00               | 0.69 ± 0.02               |
| t-Ara(f)          | 4.92 ± 0.36 <sup>A</sup>   | 4.46 ± 0.20 <sup>A</sup>  | 2.11 ± 0.21 <sup>B</sup>  |
| 5-Ara(f)          | 8.20 ± 0.61 <sup>A</sup>   | 5.75 ± 0.26 <sup>B</sup>  | 5.22 ± 0.52 <sup>B</sup>  |
| 3,5-Ara(f)        | 4.31 ± 0.32 <sup>B</sup>   | 7.49 ± 0.34 <sup>A</sup>  | –                         |
| 2,3,5-Ara(f)      | 7.55 ± 0.56 <sup>A</sup>   | 7.12 ± 0.33 <sup>A</sup>  | 2.39 ± 0.24 <sup>B</sup>  |
| 2-Rha(p)          | 2.39 ± 0.18 <sup>C</sup>   | 4.25 ± 0.32 <sup>A</sup>  | 3.23 ± 0.27 <sup>B</sup>  |
| 2,4-Rha(p)        | 4.13 ± 0.31 <sup>A</sup>   | 3.98 ± 0.18 <sup>AB</sup> | 3.33 ± 0.28 <sup>B</sup>  |
| t-Xly(p)          | 8.86 ± 0.96 <sup>B</sup>   | 13.20 ± 0.64 <sup>A</sup> | 8.81 ± 1.93 <sup>B</sup>  |
| t-Man(p)          | 3.90 ± 0.70 <sup>A</sup>   | 1.71 ± 0.44 <sup>B</sup>  | 4.52 ± 0.28 <sup>A</sup>  |
| 4-Man(p)          | 3.83 ± 0.68                | 2.33 ± 0.60               | 3.67 ± 0.23               |
| 4-Gal(p)          | 13.57 ± 2.20 <sup>A</sup>  | 15.18 ± 0.41 <sup>A</sup> | 5.46 ± 0.04 <sup>B</sup>  |
| t-GalA(p)         | 7.34 ± 1.19 <sup>B</sup>   | 8.03 ± 0.22 <sup>AB</sup> | 9.69 ± 0.06 <sup>A</sup>  |
| 4-GalA(p)         | 11.50 ± 1.86 <sup>B</sup>  | 11.50 ± 0.31 <sup>B</sup> | 26.28 ± 0.17 <sup>A</sup> |
| t-Glc(p)          | 0.93 ± 0.32 <sup>A</sup>   | 0.53 ± 0.01 <sup>AB</sup> | 0.29 ± 0.01 <sup>A</sup>  |
| 4-Glc(p)          | 9.95 ± 4.42 <sup>B</sup>   | 11.11 ± 0.14 <sup>B</sup> | 23.22 ± 0.80 <sup>A</sup> |
| 4,6-Glc(p)        | 4.24 ± 1.46 <sup>A</sup>   | 1.14 ± 0.01 <sup>A</sup>  | –                         |
| t-GlcA(p)         | 0.71 ± 0.24                | 0.31 ± 0.04               | 0.69 ± 0.02               |

132 \* Values are represented as mean ± standard error. Statistical analyses were done between fiber groups for each constituent, and values  
 133 possessing different capital letters are statistically different (Tukey's test,  $p < 0.05$ ).

134

135

136

137

138

139

140

141

142

143

144

145

146 **Table S3.** Composition of commercial chow that was used to prepare the modified chow and used to feed mice during the

147 acclimatization period.\*

| <b>Constituent</b>         | <b>Amount (%)</b> | <b>Vitamin</b>                  | <b>Amount (minimum)</b> |
|----------------------------|-------------------|---------------------------------|-------------------------|
| Dry matter                 | 88                | Vitamin A (IU/kg)               | 24000                   |
| Crude protein              | 20                | Vitamin D <sub>3</sub> (IU/kg)  | 3000                    |
| Crude cellulose            | 5                 | Vitamin E (mg/kg)               | 300                     |
| Ash                        | 5.2               | Vitamin K <sub>3</sub> (mg/kg)  | 30                      |
| Oil                        | 2.7               | Vitamin B <sub>1</sub> (mg/kg)  | 20                      |
| Calcium                    | 0.9               | Vitamin B <sub>2</sub> (mg/kg)  | 20                      |
| Phosphorous                | 0.6               | Vitamin B <sub>6</sub> (mg/kg)  | 12                      |
| Lycine                     | 0.96              | Vitamin B <sub>12</sub> (µg/kg) | 100                     |
| Methionin                  | 0.40              | Nicotinic acid (mg/kg)          | 100                     |
| Meth+Cys                   | 0.66              | Pantotenic acid (mg/kg)         | 41                      |
| Sodium                     | 0.14              | Biotin (mg/kg)                  | 6,3                     |
| Metabolic energy (Kcal/Kg) | 2600              | Cholin (mg/kg)                  | 1000                    |

148 \* Ingredient table was provided by the manufacturer (MBD Deney Hayvanları Yemi, Gebze, Kocaeli, Türkiye).

149

150

## SUPPLEMENTARY FIGURES

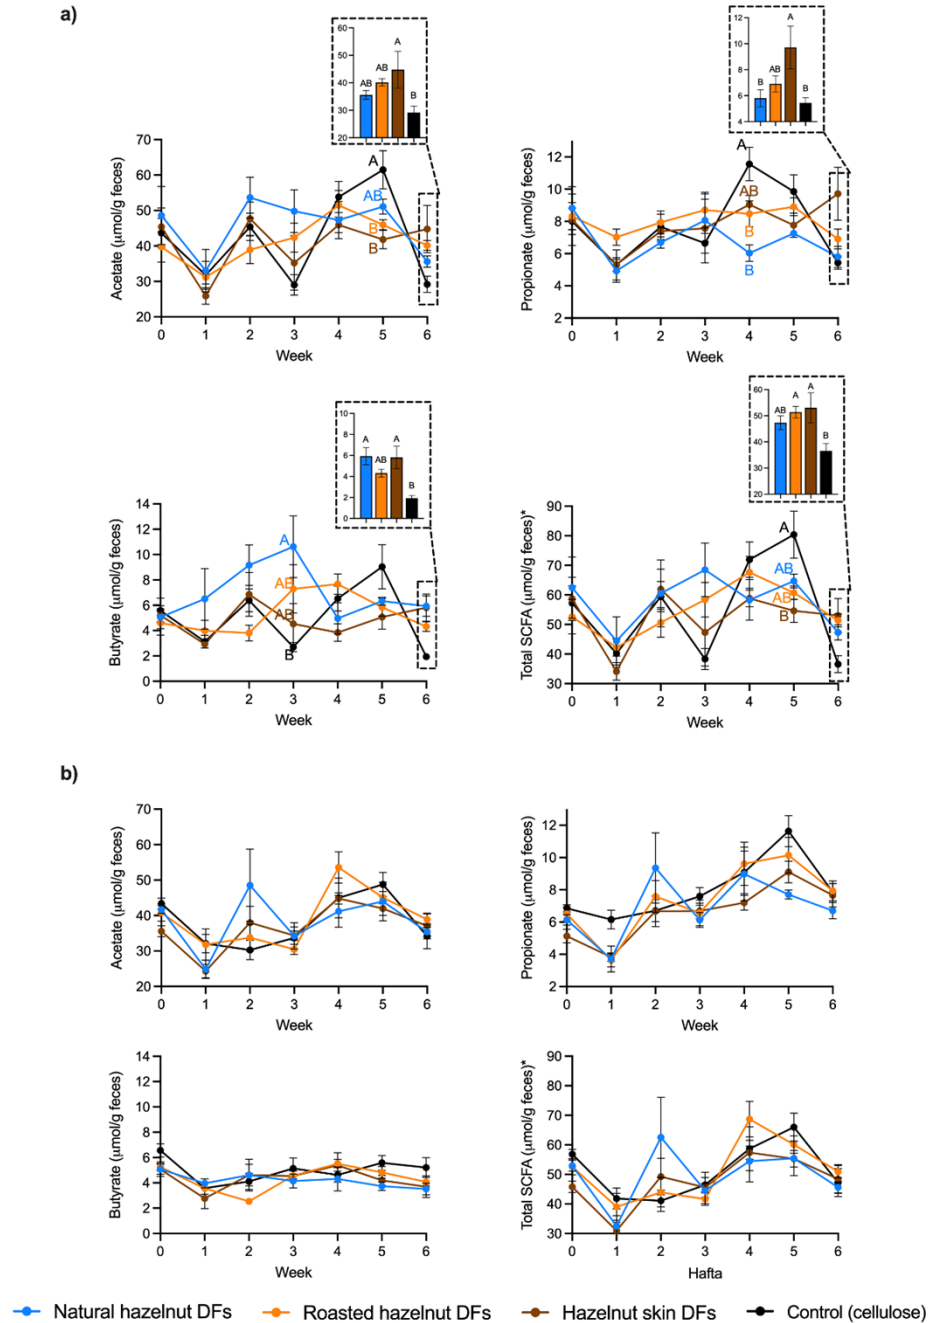

**Figure S1.** Weekly changes in the absolute amounts of acetate, propionate, butyrate and total SCFA in the feces of **a)** female and **b)** male mouse during the feeding period. Error bars represent the standard error of means (n=6). In each weeks' samples, statistical analyses were done between groups for each week, and values possessing different capital letters are statistically different (Tukey's test, P<0.05). \*Total SCFA = acetate + propionate + butyrate.

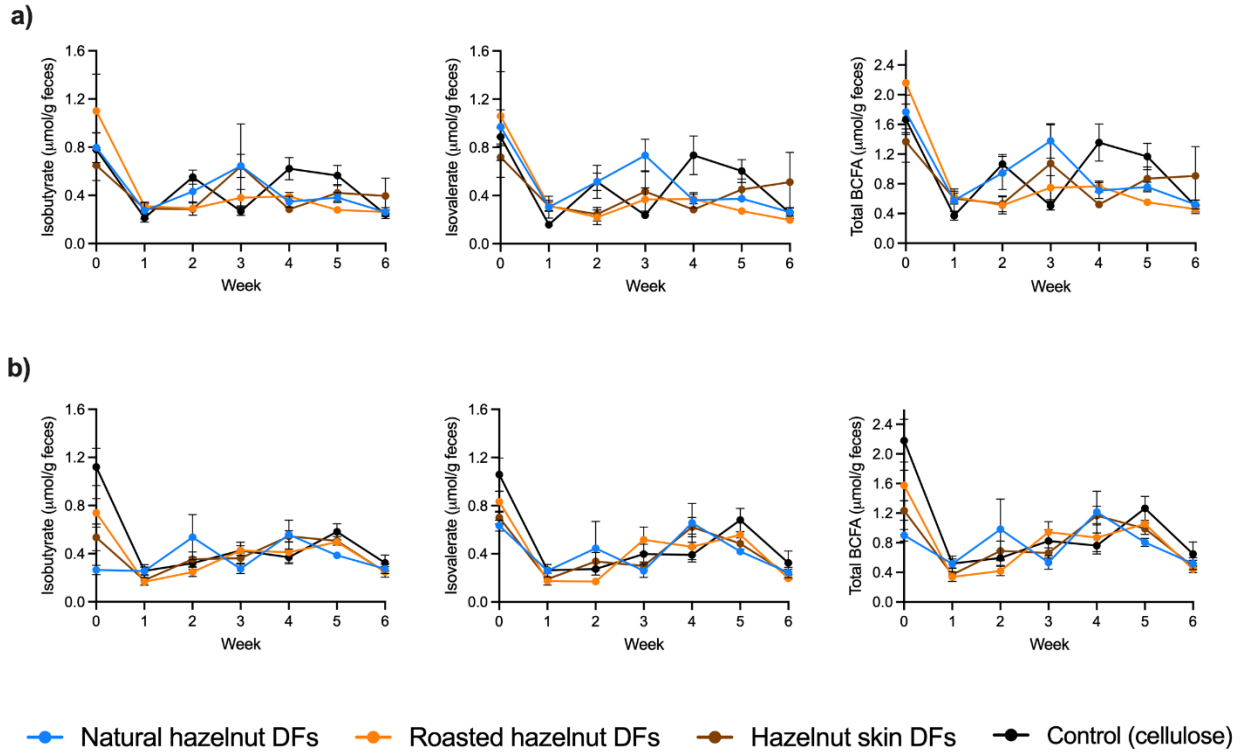

**Figure S2.** Weekly changes in the absolute amounts of isobutyrate, isovalerate, and total BCFA in the feces of **a)** female and **b)** male mouse during the feeding period. Error bars represent the standard error of means (n=6). No statistical differences were found between groups within each week (Tukey's test,  $P > 0.05$ ). \*Total BCFA = isobutyrate + isovalerate.



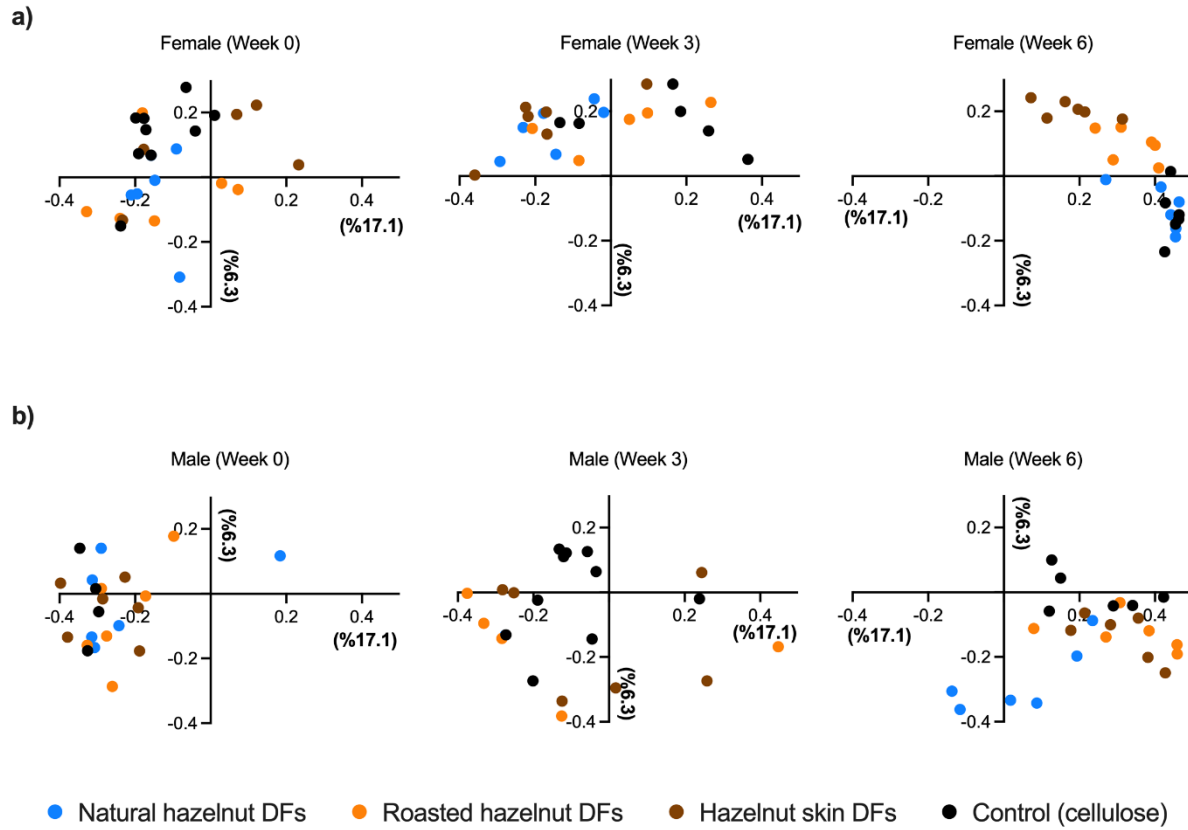

**Figure S3.** ThetaYC dissimilarity of fecal microbial communities of **a)** female and **b)** male mouse at weeks 0, 3, and 6 of feeding period based on the relative abundances of OTUs at 97% similarity level.

a)

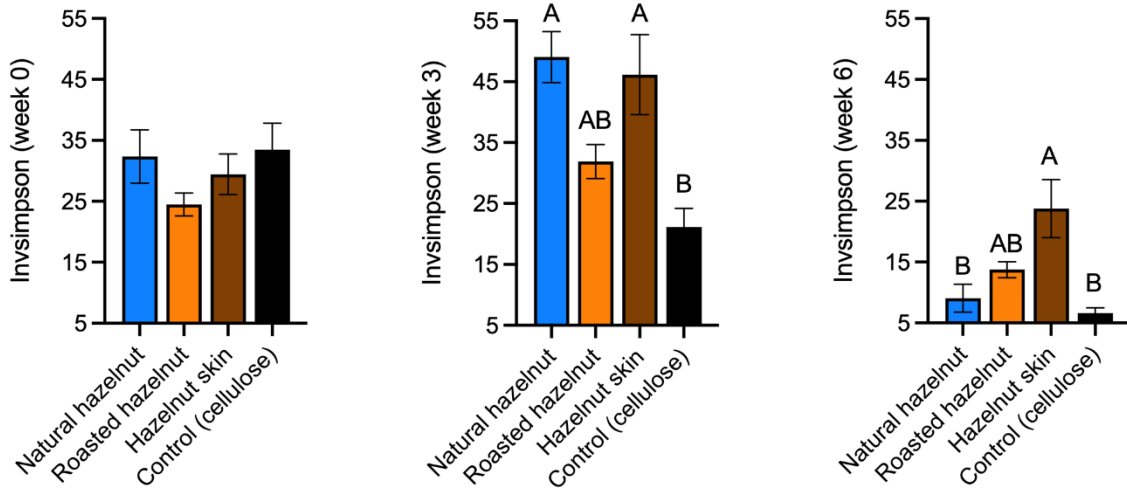

b)

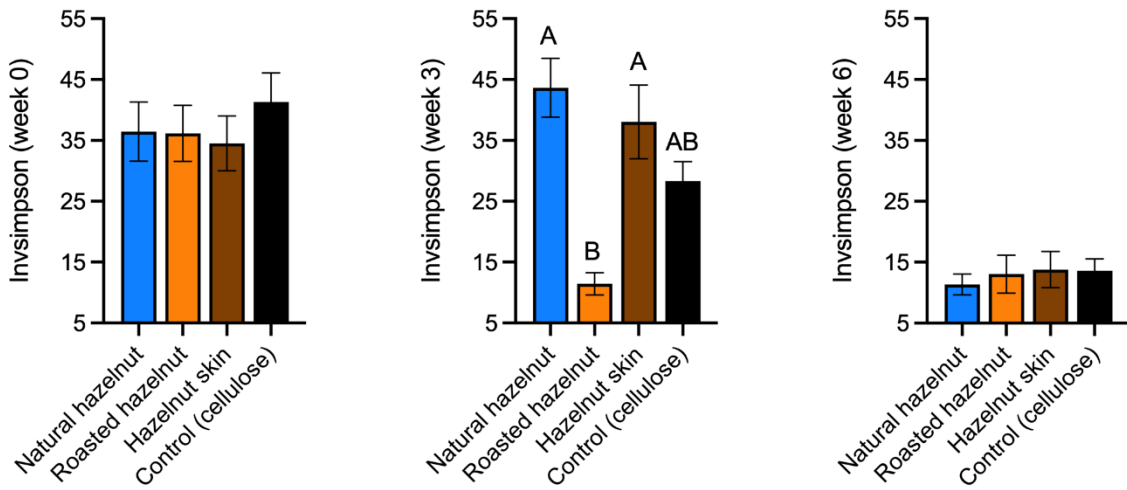

**Figure S4.** Changes in  $\alpha$ -diversity of the fecal microbiota communities of a) female and b) male mouse, as measured by Invsimpson index calculator. Error bars represent the standard error of means (n=6). Different letters represent significant differences between samples (P<0.05).

a)

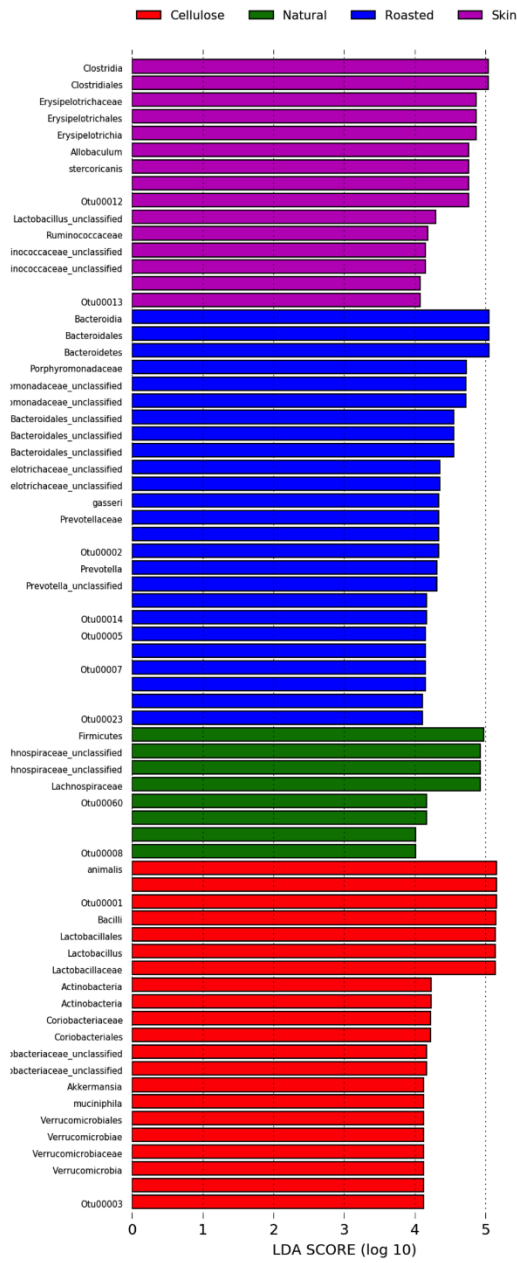

b)

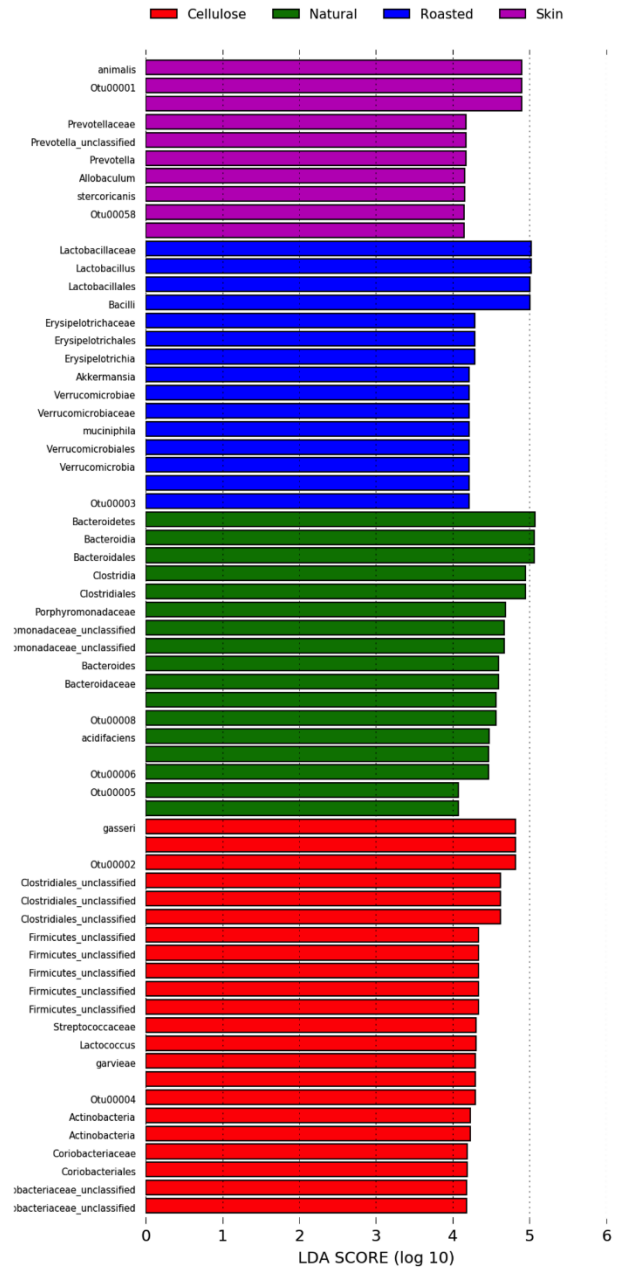

**Figure S5.** LDA results for a) female and b) male obtained as a result of LEfSe in the a) female and b) male mouse feces at the end of the feeding period (week 6) (LDA>4.0).

## References

1. F. A. Pettolino, C. Walsh, G. B. Fincher and A. Bacic, Determining the polysaccharide composition of plant cell walls, *Nat. Protoc.*, 2012, **7**, 1590-1607.
2. Y. E. Tunçil, Dietary fibre profiles of Turkish Tombul hazelnut (*Corylus avellana* L.) and hazelnut skin, *Food Chem.*, 2020, **316**, 126338.
3. N. C. Carpita and M. C. McCann, The functions of cell wall polysaccharides in composition and architecture revealed through mutations, *Plant Soil*, 2002, **247**, 71-80.
4. S. C. Fry, Cell wall polysaccharide composition and covalent crosslinking, *Annual plant reviews*, 2011, **41**, 1-42.
5. H. V. Scheller and P. Ulvskov, Hemicelluloses, *Annu. Rev. Plant Biol.*, 2010, **61**, 263-289.
6. D. Chen, P. J. Harris, I. M. Sims, Z. Zujovic and L. D. Melton, Polysaccharide compositions of collenchyma cell walls from celery (*Apium graveolens* L.) petioles, *BMC Plant Biol.*, 2017, **17**, 1-13.
7. USDA, FoodData Central, 2018, <https://fdc.nal.usda.gov/>.
8. C. Kurz, R. Carle and A. Schieber, Characterisation of cell wall polysaccharide profiles of apricots (*Prunus armeniaca* L.), peaches (*Prunus persica* L.), and pumpkins (*Cucurbita* sp.) for the evaluation of fruit product authenticity, *Food Chem.*, 2008, **106**, 421-430.
9. S. Singh, G. Singh and S. K. Arya, Mannans: An overview of properties and application in food products, *Int. J. Biol. Macromol.*, 2018, **119**, 79-95.
10. R. F. Tester and F. H. Al-Ghazzewi, Mannans and health, with a special focus on glucomannans, *Food Res. Int.*, 2013, **50**, 384-391.
11. M. Pauly and K. Keegstra, Biosynthesis of the plant cell wall matrix polysaccharide xyloglucan, *Annu. Rev. Plant Biol.*, 2016, **67**, 235-259.
